# Supplementary figures and images for: Brca1 Is Upregulated by 5-Aza-CdR and Promotes DNA Repair and Cell Survival, and Inhibits Neurite Outgrowth in Rat Retinal Neurons
Source: MDPI journal article supplement (doi:10.3390/ijms19041214), 2018-04-17

**Figure S1**

**Figure 1C**

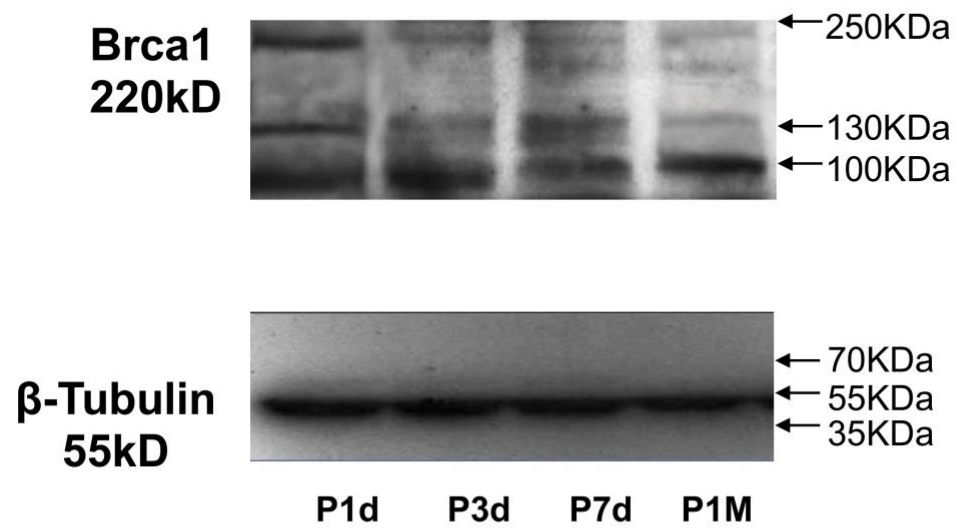

**Figure S2**

**Figure 2C**

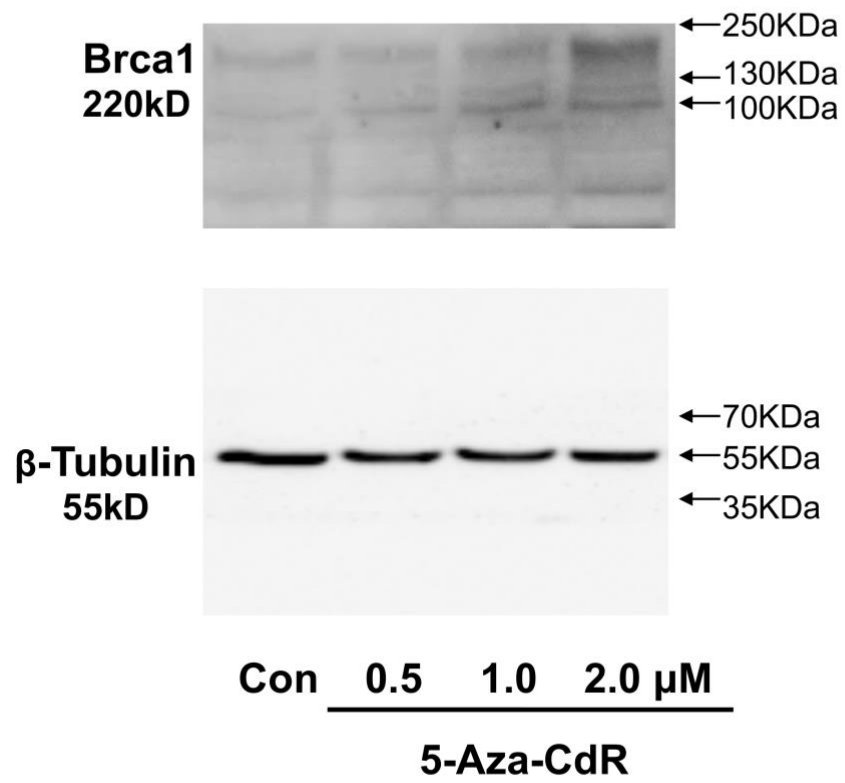

**Figure 3A**

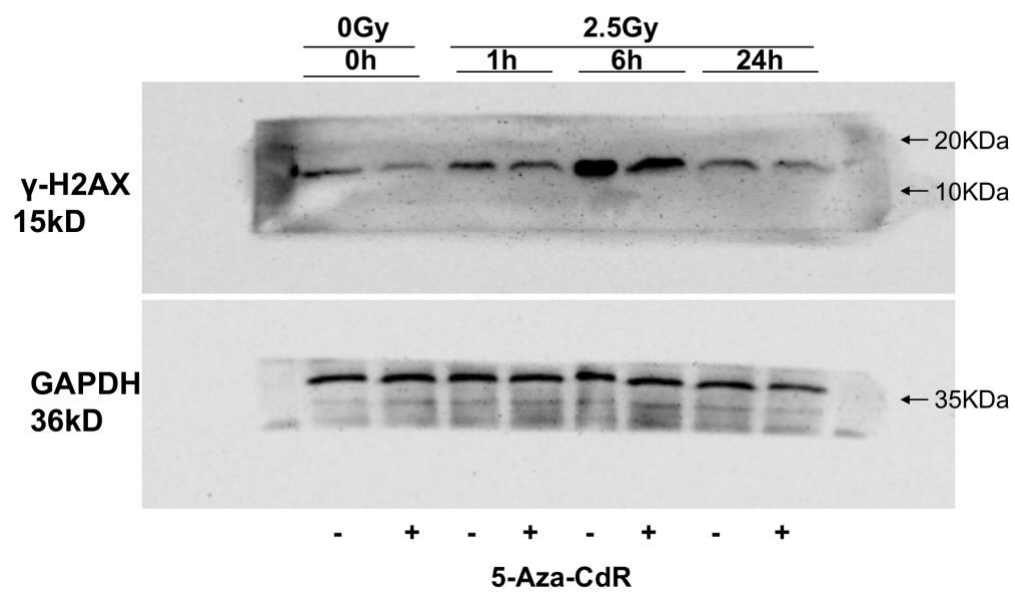

Supplement: s1 [file s1]
